# Supplementary material
Source: Research Square preprint supplement (doi:10.21203/rs.3.rs-9729971/v1)
Supplement: Supplementary file 1 [file 74e5ebef6327c8ee4af4c0a1.doc]

**Applying the Precaution Adoption Process Model to Predict Fall Prevention Behaviors in Older Adults: a cross‑sectional study.**

Vahidreza Borhaninejad1, Reza Sadeghi2, Seyed Vahid Ahmadi Tabatabaei3, Abbas Pour Pasandi4, Parniya Abolghaseminejad5,6*

1 Social Determinants of Health Research Center, Institute for Futures Studies in Health, Kerman University of Medical Sciences, Kerman, Iran. Email: [v.borhani@yahoo.com](mailto:v.borhani@yahoo.com), ORCID ID: https://orcid.org/0000-0002-4689-6741

2 Department of Public Health, Sirjan School of Medical Sciences, Sirjan, Iran. Email: [reza.sadeghi351@yahoo.com](mailto:reza.sadeghi351@yahoo.com), ORCID ID: https://orcid.org/0000-0002-5162-6316

3 Social Determinants of Health Research Center, Institute for Futures Studies in Health, Kerman University of Medical Sciences, Kerman, Iran. Email: [v.tabatabaei@gmail.com](mailto:v.tabatabaei@gmail.com), ORCID ID: https://orcid.org/0000-0002-5000-8575

4 Sirjan School of Medical Sciences, Sirjan, Iran. Email: a.pourpasandi@sirums.ac.ir

5 Social Determinants of Health Research Center, Institute for Futures Studies in Health, Kerman University of Medical Sciences, Kerman, Iran.

6 Department of Health Education and Promotion, School of Public Health, Tehran University of Medical Sciences, Tehran, Iran. Email: Parniya.ab.20@gmail.com, ORCID ID: https://orcid.org/0000-0002-8114-4692

*** Corresponding author:** Email: [Parniya.ab.20@gmail.com](mailto:Parniya.ab.20@gmail.com)

**Clinical trial number:** not applicable.

**Abstract**

**Background:** Falls are a common problem among older adults, often leading to serious injuries and long-term disability. To reduce falls and prevent related injuries, this study aimed to identify predictors of fall prevention behaviors in older adults of Sirjan city, based on the precaution adoption process model.

**Methods:** This descriptive-analytical cross-sectional study was conducted among the older population of Sirjan city in 2024. Participants were selected using stratified sampling based on inclusion criteria. Data were collected through a demographic questionnaire and a multi-part questionnaire assessing awareness, constructs of the Health Belief Model, and the Precaution Adoption Process Model. Data were analyzed using descriptive and inferential statistics in SPSS20. A significance level of < 0.05 was considered.

**Results**: The mean age of the older participants was 69.69 ± 4.92 years. Women constituted the majority of participants (58.5%). Regression analysis revealed that only perceived barriers had a significant relationship with fall prevention in older adults (p=0.002).

**Conclusions:** This study highlights the significant role of perceived barriers in determining the effectiveness of fall prevention measures for older adults. Effective strategies should address these barriers while simultaneously increasing awareness and self-efficacy to improve outcomes.

**Keywords:** Falls, Older Adults, Precaution Adoption Process Model.

**Background**

The global population is aging rapidly due to declining mortality rates and increasing life expectancy (1). In tandem with these demographic shifts, health issues among older adults are on the rise. Physiological, cognitive, and psychological changes associated with aging negatively impact the functional abilities of older adults, increasing fall risk (2). While falls can occur at any age, they are more prevalent and consequential among older adults (3). Evidence suggests that at least one-third of older adults over 65 experience a fall, and this rate increase to 50% for those aged 80 (4).

A fall is defined as an unintentional sudden change in position, resulting in a descent to a lower level or the ground (5). This event can be triggered by a combination of predisposing and aggravating factors (6). To maintain normal walking and prevent falls, individuals must coordinate various functions, including vision, hearing, neural networks, muscle tone, and mental focus (7). In older adults, impaired coordination in these functions, coupled with age-related conditions like sarcopenia, slower walking speed, and shorter step length, increases the risk of falls (8). Falls can significantly impact an older adult’s functional abilities, leading to loss of independence. Beyond physical limitations, falls can also have psychological and cognitive consequences, such as increased dependence, depression, anxiety, decreased life expectancy, physical weakness, fear of falling, reduced self-efficacy, limited activity, diminished quality of life, and societal costs (7, 9). Therefore, implementing effective strategies to prevent and reduce falls in older adults is crucial to mitigate these adverse outcomes (7).

One strategy involves conducting research based on health models. Health education models provide a framework for identifying factors that influence behavior change and its maintenance (10). The Precaution Adoption Process Model (PAPM), developed by Weinstein in 1992, is one such behavior change model (11). It explains how individuals make decisions to engage in a specific behavior and progress towards action. The PAPM outlines seven stages: 1) unaware of the issue, 2) aware of the issue but not personally engaged, 3) engaged and deciding what to do, 4) having decided not to act, 5) planning to act, 6) acting, and 7) maintenance. The model emphasizes the role of perceived susceptibility, perceived severity, perceived benefits, perceived barriers, self-efficacy, and cues to action in facilitating movement through these stages (12).

Various studies indicate that media and educational interventions are effective in transitioning individuals from the first stage to the second stage, while personal experiences and influential individuals play a crucial role in moving people from the second stage to the third stage. Factors such as perceived susceptibility, perceived severity, perceived benefits, perceived barriers, and self-efficacy can influence individuals’ decisions to either withdraw from or engage in a particular behavior. For those in the acting and maintenance stages, cues to action are particularly important (10). Mazloomy et al.’s research demonstrated that enhanced knowledge, perceived benefits, and cues to action positively influenced the likelihood of engaging in fall prevention behaviors. Conversely, increasing age and perceived barriers were associated with a decreased likelihood of these behaviors (13).

Moreover, it is evident that self-care practices can significantly reduce the risk of falls among older adults. Even if a fall occurs, individuals who prioritize their health are less likely to experience severe complications and can maintain their independence. This is because health-conscious individuals are more likely to avoid risky behaviors and actively seek to modify unsafe habits. The Precaution Adoption Process Model (PAPM) is a widely used framework that examines the stages individuals go through as they adopt a new behavior. This model can help explain how individuals decide to engage in a particular behavior and translate that decision into action. This study aimed to identify factors predicting fall prevention behaviors among older adults in Sirjan city, using the PAPM to guide targeted interventions.

**Methods**

**Study design and setting**

This descriptive–analytical cross‑sectional study was conducted among older adults in Sirjan city, Iran, in 2024.

**Participants and sampling**

Participants were selected using a stratified random sampling method. Sirjan city was divided into two strata (north and south). From each stratum, four health centers were randomly selected. Subsequently, 25 older adults were randomly selected from each center based on the available case list. If selected individuals did not meet the inclusion criteria, additional participants were recruited until the required sample size was achieved.

The inclusion criteria were age ≥60 years and the ability to walk independently without assistive devices during the previous six months. The exclusion criterion was unwillingness to participate in the study.

Based on a similar study (14) and using a sample size formula with a 95% confidence level (Z = 1.96), precision of 0.06 (d = 0.06), and an estimated proportion greater than 0.3 (P > 0.3), the required sample size was calculated as 190 participants. Considering the possibility of dropout and to facilitate data collection, a total of 200 older adults were included in the study.

**Data collection instruments**

Data were collected using a demographic information questionnaire and a structured questionnaire consisting of three sections: knowledge, constructs of the Health Belief Model (HBM), and stages of the Precaution Adoption Process Model (PAPM).

**Demographic information questionnaire**

This questionnaire collected information on age, sex, education level, occupation, marital status, economic status, history of falls in the previous six months, frequency of falls, location and time of falls, medication use, and chronic health conditions including hypertension, diabetes, cardiovascular disease, stroke, arthritis, visual and hearing impairment, pulmonary disease, sleep disorders, urinary incontinence, and lumbar disk disease.

**Knowledge questionnaire**

Knowledge about fall prevention was assessed using six questions with response options of “yes,” “no,” and “do not know.” Scores of 2, 1, and 0 were assigned to “yes,” “do not know,” and “no” responses, respectively. The total score ranged from 0 to 12, with higher scores indicating greater knowledge.

**Health Belief Model constructs**

HBM constructs included perceived susceptibility, perceived severity, perceived benefits, perceived barriers, self‑efficacy, and cues to action. Each construct was measured using items scored on a five‑point Likert scale (strongly agree, agree, no idea, disagree, strongly disagree). Scores ranged from 5 to 30 for each construct.

**Precaution Adoption Process Model (PAPM)**

Stages of adoption of fall‑prevention behaviors were assessed according to the PAPM, which includes seven stages:

1. Unaware of the issue
2. Aware of the issue but not personally engaged
3. Deciding what to do
4. Decided not to act
5. Decided to act
6. Acting
7. Maintenance

These stages were assessed using a two‑point Likert scale, with “yes” scored as 2 and “no” scored as 1.

**Validity and reliability**

The validity and reliability of the questionnaire were established in a previous study by Mazloomy et al. (2018). Content validity was assessed by a panel of 10 experts in health education and epidemiology, and revisions were made based on their feedback. The overall content validity exceeded 80%. Reliability was evaluated using a test–retest method among 30 older adults with a two‑week interval, yielding a correlation coefficient of r = 1. Cronbach’s alpha coefficients were reported as 0.79 for knowledge, 0.84 for perceived susceptibility, 0.82 for perceived severity, 0.76 for perceived barriers, 0.80 for cues to action, 0.81 for perceived benefits, and 0.76 for self‑efficacy (13).

**Study procedure**

After obtaining ethical approval from the Ethics Committee of Kerman University of Medical Sciences (IR.KMU.REC.1402.137), coordination was made with the Health Vice‑Chancellor of Sirjan School of Medical Sciences to identify eligible health centers. Eight centers (four from each stratum) were selected. Older adults were randomly selected from the case lists of these centers.

Participants were invited to the selected health centers, where the objectives of the study were explained and written informed consent was obtained. Literate participants completed the questionnaires themselves, while trained researchers conducted interviews with participants who were illiterate or had low literacy levels.

**Statistical analysis**

Data were analyzed using SPSS version 20. Descriptive statistics including mean and standard deviation were used to summarize quantitative variables, while frequencies and percentages were used for categorical variables. Pearson correlation coefficient and linear regression analysis were applied to examine the relationships between variables. A p‑value < 0.05 was considered statistically significant.

**Results**

The mean age of participants was 69.69 ± 4.92 years. Most of the participants were women (58.5%) and housewives (44.5%). The majority had an elementary education (39.5%) and were married (76%). Economically, most were in the middle class (64%). Regarding falls, 52 participants (26%) had fallen in the past six months. Of these, 28 fell once, 22 fell twice, and 2 fell three times. The most common time for falls was evening (29, 14.5%), and the most common place was home (37, 18.5%). In terms of health, 82% had a history of medication use and 82% had underlying diseases. Hypertension was the most common underlying condition, affecting 53.5% of the participants (Table 1).

21% of older participants were unaware of fall prevention measures. While 56.5% were aware of them, they were not personally engaged. However, 76% decided seriously about preventive measures. Interestingly, 66% had not made a decision to prevent falls. Despite this, 76.5% planned to implement at least one preventive measure within a month. 80% had previously used preventive strategies, and 81% were actively taking steps to prevent falls (Table 2).

Table 3 indicates no correlation between decision to prevent falls, knowledge, perceived susceptibility, and perceived benefits (p>0.05). However, significant positive correlations were observed between decision to prevent falls, perceived severity (r= 0.19, p= 0.006), perceived barriers (r= 0.27, p= 0.001), self-efficacy (r= 0.22, p= 0.002), and cues to action (r= 0.18, p= 0.01). This indicates that individuals are more likely to decide on fall prevention when they perceive falls as severe, face fewer barriers, feel confident, and receive clear cues.

The regression analysis indicated that only perceived barriers significantly influenced the decision to prevent falls (p=0.002). Other factors did not significantly contribute to the decision-making process.

**Discussion**

This study aimed to identify factors influencing fall prevention behaviors in older adults of Sirjan city using the Precaution Adoption Process Model (PAPM). Correlational analysis revealed positive associations between perceived severity, perceived barriers, self-efficacy, cues to action, and the decision to prevent falls. This suggests that older adults who recognize the risks of falling, believe in their ability to prevent falls, follow guidance, and engage in preventive behaviors are more likely to adopt fall prevention strategies.

However, regression analysis indicated that perceived barriers were the sole predictor of fall prevention behaviors. This finding highlights that while motivation to prevent falls is important, perceived barriers, such as the cost and time required for home modifications, lack of family support, and resistance to change, can significantly impede individuals from taking effective preventive actions. Such barriers can discourage proactive measures or expose limitations in available resources and support systems. Therefore, while enhancing self-efficacy and providing clear cues are crucial, interventions should prioritize identifying and addressing perceived barriers to promote fall prevention behaviors among older adults.

These findings align with previous research. For example, Mazloomy et al. identified perceived barriers as a significant factor in reducing falls among older adults (13). Kaushal et al. found that perceived barriers to physical activity strongly influenced the intention to engage in physical activity in individuals with a history of falls (15). A review of studies examining the Health Belief Model revealed that perceived barriers and benefits were the strongest predictors of behavior change (16). Chao et al. reported an inverse relationship between perceived barriers and health-oriented behaviors, suggesting that fewer perceived barriers lead to increased engagement in healthy behaviors (17). Robinson also highlighted perceived barriers as the strongest predictor of self-care behaviors in older adults (18). Based on these findings, increasing awareness of the barriers faced by older adults in preventing falls can empower them to find ways to overcome these challenges. By addressing and reducing these barriers, interventions can become more targeted, practical, and effective in preventing falls and improving the quality of life for older adults (19).

While this study contributes to the understanding of fall prevention behaviors in older adults by applying the PAPM, it has several limitations. The study participants were limited to older adults who could walk independently, with or without assistive devices. This limitation restricts the generalizability of the findings to older adults with reduced mobility. Additionally, the use of stratified sampling from health centers may introduce sampling bias, as it may not fully represent the broader older population. Reliance on self-report data can also lead to response bias. Furthermore, the cross-sectional design and focus on a single city may limit the generalizability of the findings to other regions and over time. To address these limitations, future research could employ longitudinal studies in diverse geographic locations to enhance generalizability.

**Conclusions**

This study underscores the critical role of perceived barriers in preventing falls among older adults. While awareness of fall risks and self-efficacy are important factors, perceived barriers emerge as the most influential factor in determining preventive behavior. To prevent falls, targeted interventions must focus on addressing and mitigating these obstacles. Comprehensive fall prevention programs should combine education, empowerment, and support to ensure that older adults not only understand the risks but also possess the necessary tools and resources to overcome barriers and adopt preventive strategies.

**Declarations**

**Ethics approval and consent to participate**

The Vice Chancellor of Research and Technology in Kerman University of Medical Sciences approved the study after the study proposal was submitted. All the information subjects provided during the research project was documented so that their identities remained confidential. No one but the principal investigator can access the collected data, which is securely stored. Additionally, participants were informed that they could share only what they felt comfortable disclosing and that they had the right to withdraw from the study at any time at their discretion. All informed consent forms were signed by the participants or their legal guardians. They were made aware that participation was entirely voluntary and that they had the right to read, discuss, and ask questions about the study protocol and the benefits and risks of participation with the researcher.

**Consent for publication**

All authors have given their consent for publication.

**Availability of data and materials**

All data generated or analysed during this study are included in this published article.

**Competing interests**

There are no competing interests.

**Funding**

There is no funding.

**Authors' contributions**

All authors contributed to data collection, data analysis, and writing of the article.

**Acknowledgement**

Kerman University of Medical Sciences approved this study (Research Project No. 402000215, Ethics Code of IR.KMU.REC.1402.137). We would like to thank the Vice-Chancellor of Research and Technology of Kerman University of Medical Sciences for their financial support and to all older adults for their cooperation.

**References**

1. Mazloomy Mahmoodabad S.S, Zareipour M. The effect of educational intervention on promoting knowledge and self -efficacy of elderly in preventing falling. J Saf Promot Inj Prev. 2020;7:226–33. .

2. Gazibara T, Kurtagic I, Kisic-Tepavcevic D, Nurkovic S, Kovacevic N, Gazibara T, et al. Falls, risk factors and fear of falling among persons older than 65 years of age. Psychogeriatrics. 2017;17:215–23. .

3. Mehta J, Knowles K, Wilson E. Prevalence of falls in patients presenting to an ophthalmic outpatients department-A surveillance study. The British and Irish Orthoptic Journal. 2021;17(1):134.

4. Sotoudeh A, zareipour m, Fattahi Ardakani M. Prevalence of falls and its relationship with joint diseases in the elderly in Urmia. Iran J Orthop Surg. 2021;19:68–72. .

5. Taheri Tanjani P, Ainy E, Akbarpour S, Soori H. Study of characteristics of falls among Iranian elders. Saf Promot Injury Prev. 2015;2:313–20.

6. Onder G, Giovannini S, Sganga F, Manes-Gravina E, Topinkova E, Finne-Soveri H, Garms-Homolová V, Declercq A, van der Roest HG, Jónsson PV, van Hout H. Interactions between drugs and geriatric syndromes in nursing home and home care: Results from Shelter and IBenC projects. Aging clinical and experimental research. 2018 Sep;30:1015-21.

7. Giovannini S, Brau F, Galluzzo V, Santagada DA, Loreti C, Biscotti L, Laudisio A, Zuccalà G, Bernabei R. Falls among Older Adults: Screening, Identification, Rehabilitation, and Management. Applied Sciences. 2022; 12(15):7934. .

8. Laurence BD, Michel L. The fall in older adults: Physical and cognitive problems. Current Aging Science, 2017,10 (3).

9. Mahmoodabad SSM, Zareipour M, Askarishahi M, Beigomi A. Effect of the living environment on falls among the Elderly in Urmia. Open Access Maced J Med Sci. 2018;6:2233–8. .

10. Jadgal MS, Movahed E, Dashti S, Khazir Z, Zareipour M. Preventing falls of the elderly at home: Applying the precaution adoption process model. J Educ Health Promot. 2023 Apr 28;12:115. .

11. Weinstein ND, Sandman PM. A model of the precaution adoption process: Evidence from home radon testing. Health Psychol. 1992;11:170–80. .

12. Weinstein ND, Rothman AJ. Commentary: Revitalizing research on health behavior theories. Health Educ Res. 2005;20:294–7.

13. Mahmoodabad S, Zareipour M, Askarishahi M, Bigomi A. Prevention Determinants of Falling in the Elderly Citizens: a Precaution Adoption Process Model (PAPM) Carried-out in Urmia, Iran. Ambient Science. 2018;5.

14. Mahmoodabad SSM, Zareipour MA, Askarishahi M, Beigomi A. Prevention Determinants of Falling in the Elderly Citizens: a Precaution Adoption Process Model (PAPM) Carried-out in Urmia, Iran. Ambint Science. 2018;5(2):41-5.

15. Kaushal N., Preissner C., Charles K., Knäuper B. Differences and similarities of physical activity determinants between older adults who have and have not experienced a fall: Testing an extended health belief model. Arch. Gerontol. Geriatr. 2021;92:104247. .

16. Sulat J.S., Prabandari Y.S., Sanusi R., Hapsari E.D., Santoso B. The validity of health belief model variables in predicting behavioral change: A scoping review. Health Educ. J. 2018;6:499–512. .

17. Chao J.,Nau D.P., Aikens J.E, Taylor S.D. The mediating role of health beliefs in the relationship between depressive symptoms and medication adherence in persons with diabetes. Res. Social Adm. Pharm,2005,1(4):508-525.

18. Robinson T.D. Hypertension Beliefs and Behav-iors of African Americans in Seleceted Cleve-land Public Housing. [PhD thesis]. KentState University, USA. 2012.

19. Zare M, Ghodsbin F, Jahanbin I, Ariafar A, Keshavarzi S, Izadi T. The effect of health belief model-based education on knowledge and prostate cancer screening behaviors: a randomized controlled trial. IJCBNM. 2016;4(1 ):57–68.

**Table 1: The frequency** and percentage of demographic and background variables of the older adults

|  | Variable | Frequency | Percent |
| --- | --- | --- | --- |
| Sex | Male | 83 | 41.5 |
| Female | 117 | 58.5 |
| Job | Retired | 56 | 28 |
| Housewife | 89 | 44.5 |
| Self-employed | 25 | 12.5 |
| Farmer | 19 | 9.5 |
| Unemployed | 11 | 5.5 |
| Education level | Uneducated | 52 | 26 |
| Elementary | 79 | 39.5 |
| Lower secondary | 34 | 17 |
| Upper secondary | 22 | 11 |
| Academic | 13 | 6.5 |
| Marital status | Married | 152 | 76 |
| Widowed | 48 | 24 |
| Economic status | Good | 38 | 19 |
| Moderate | 128 | 64 |
| Poor | 34 | 17 |
| History of falls | Yes | 52 | 26 |
| No | 48 | 74 |
| Frequency of falls | 0 | 148 | 74 |
| 1 | 28 | 14 |
| 2 | 22 | 11 |
| 3 | 2 | 1 |
| Time of falls | Morning | 15 | 7.5 |
| Evening | 29 | 14.5 |
|  | Night | 8 | 4 |
| No falls | 148 | 74 |
| Location of falls | Indoor | 37 | 18.5 |
| Outdoor | 15 | 7.5 |
| No falls | 148 | 74 |
| History of medication use | Yes | 164 | 82 |
| No | 36 | 18 |
| History of underlying disease | Yes | 164 | 82 |
| No | 36 | 18 |
| Hypertension | Yes | 107 | 53.5 |
| No | 93 | 46.5 |
| Diabetes | Yes | 53 | 26.5 |
| No | 147 | 73.5 |
| Cardiovascular disease | Yes | 51 | 25.5 |
| No | 149 | 74.5 |
| Arthritis | Yes | 36 | 18 |
| No | 164 | 82 |
| Stroke | Yes | 12 | 6 |
| No | 188 | 94 |
| Vision impairment | Yes | 32 | 16 |
| No | 168 | 84 |
| Hearing impairment | Yes | 22 | 11 |
| No | 178 | 89 |
| Sleep disorders | Yes | 31 | 15.5 |
| No | 169 | 84.5 |
| Pulmonary diseases | Yes | 24 | 12 |
| No | 176 | 88 |
| Urinary incontinence | Yes | 15 | 7.5 |
| No | 185 | 92.5 |
| Lumbar disk disease | Yes | 10 | 5 |
| No | 190 | 95 |

**Table 2: The frequency and percentage of different stages of fall prevention in older adults**

| Variable |  | Frequency | Percent |
| --- | --- | --- | --- |
| Unaware of the issue | Yes | 158 | 79 |
| No | 42 | 21 |
| Aware of the issue but not personally engaged | Yes | 113 | 56.5 |
| No | 87 | 43.5 |
| Engaged and deciding what to do | Yes | 152 | 76 |
| No | 48 | 24 |
| Having decided not to act | Yes | 132 | 66 |
| No | 68 | 34 |
| Planning to act | Yes | 153 | 76.5 |
| No | 47 | 23.5 |
| Acting | Yes | 160 | 80 |
| No | 40 | 20 |
| Maintenance | Yes | 162 | 81 |
| No | 38 | 19 |

**Table 3: The relationship between knowledge, the constructs of the health belief model, and the decision to prevent falls in older adults**

| Variable | The decision to prevent falls |
| --- | --- |
| Knowledge | R= 0.11*, P value= 0.12 |
| Perceived susceptibility | R= 0.13, P value= 0.052 |
| Perceived severity | R= 0.19, P value= 0.006 |
| Perceived benefits | R= 0.12, P value= 0.077 |
| Perceived barriers | R= 0.27, P value= 0.001 |
| Self-efficacy | R= 0.22, P value= 0.002 |
| Cues to action | R= 0.18, P value= 0.01 |

* Pearson correlation coefficient

Table 4: Determining the effective variables in preventing older adults from falling by using the linear regression test

| Variable | Non-standardized coefficients | | Standard coefficient | T | P-value |
| --- | --- | --- | --- | --- | --- |
| β | Standard error |
| Knowledge | 0.06 | 0.05 | 0.09 | 1.17 | 0.24 |
| Perceived susceptibility | - 0.01 | 0.03 | - 0.04 | - 0.56 | 0.57 |
| Perceived severity | 0.02 | 0.03 | 0.06 | 0.7 | 0.48 |
| Perceived benefits | 0.03 | 0.03 | 0.08 | 0.98 | 0.32 |
| Perceived barriers | 0.06 | 0.02 | 0.22 | 3.11 | 0.002 |
| Self-efficacy | 0.04 | 0.03 | 0.1 | 1.26 | 0.2 |
| Cues to action | 0.04 | 0.03 | 0.1 | 1.39 | 0.16 |
| Age | 0.03 | 0.09 | 0.02 | 0.34 | 0.72 |
| Sex | - 0.17 | 0.19 | - 0.06 | - 0.91 | 0.36 |
| Job | 0.02 | 0.07 | 0.03 | 0.41 | 0.68 |
| Education level | - 0.11 | 0.08 | - 0.1 | - 1.33 | 0.18 |
| Marital status | - 0.08 | 0.21 | - 0.02 | - 0.38 | 0.7 |
| Economic status | 0.27 | 0.15 | 0.12 | 1.76 | 0.08 |
| History of falls | - 0.52 | 0.92 | - 0.17 | - 0.56 | 0.57 |
| Time of falls | - 0.19 | 0.27 | - 0.15 | - 0.7 | 0.48 |
| Location of falls | 0.45 | 0.38 | 0.27 | 1.19 | 0.53 |
